# Supplementary material for: Preparation and properties of bio-based degradable polybenzoxazines containing dihydrazone-based dynamic bonds
Source: Royal Society of Chemistry journal article supplement (doi:10.1039/d5py00363f), 2025-01-01
Supplement: d5py00363f1.pdf [file d5py00363f1.pdf]

Supporting Information  
**Preparation and properties of bio-based degradable  
polybenzoxazines containing dihydrazone-based dynamic  
bonds**

*Aying Wang<sup>a</sup>, Yifen Xu<sup>b</sup>, Wenli Zhao<sup>a</sup>, Jinning Zhang<sup>a</sup>, Fengjun Chen<sup>a</sup>, Zhongxiang*

*Xia<sup>a</sup>, Lidong Zhang<sup>a</sup>, Jing Song<sup>a</sup>, Lixian Yin<sup>c\*</sup>, Zhi Wang<sup>a\*</sup>*

<sup>a</sup> School of Materials Science and Engineering, North University of China, Taiyuan, Shanxi, 030051, China

<sup>b</sup> Aerospace Research Institute of Materials & Processing Technology, Beijing, 100076, China

<sup>c</sup> College of Mechatronic Engineering, North University of China, Taiyuan, Shanxi, 030051, China

\*: Corresponding author. Email address: [hugh-wang@nuc.edu.cn](mailto:hugh-wang@nuc.edu.cn).  
[yinlixian@nuc.edu.cn](mailto:yinlixian@nuc.edu.cn)

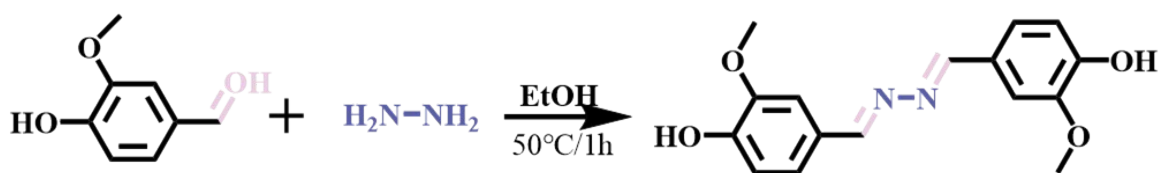

Scheme S1. Synthesis of dihydrazol-containing ketol

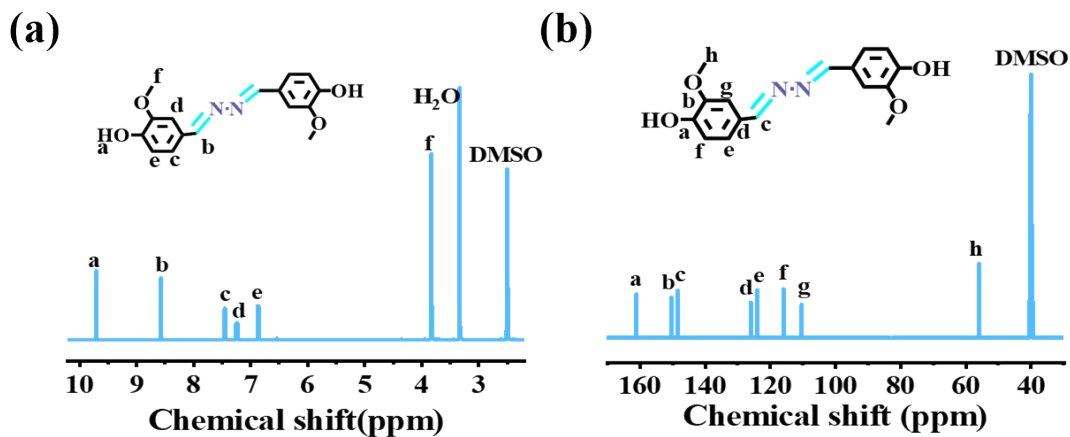

Figure S1. (a)  $^1\text{H}$ NMR and (b)  $^{13}\text{C}$  NMR of HDE.

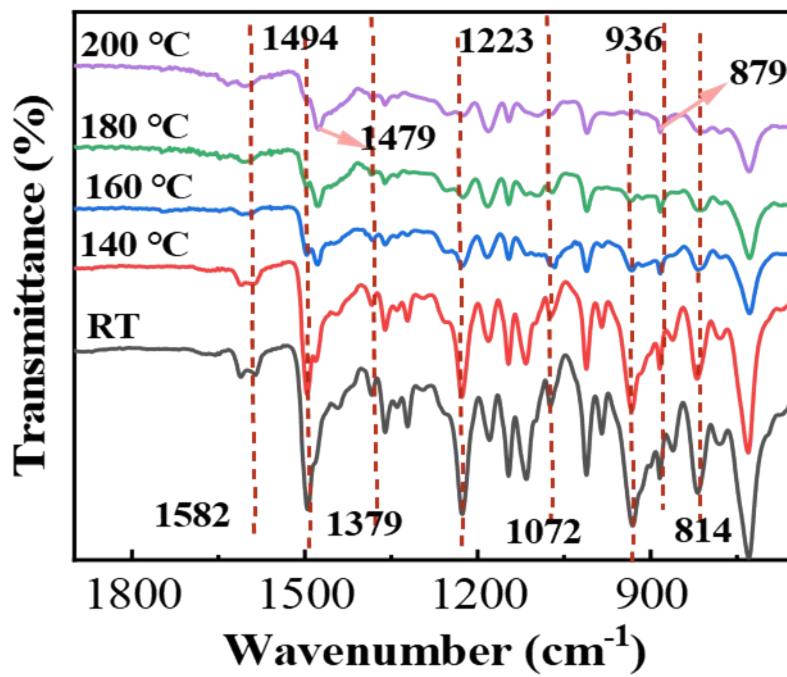

Figure S2. FTIR spectrum of BA-F at different stages

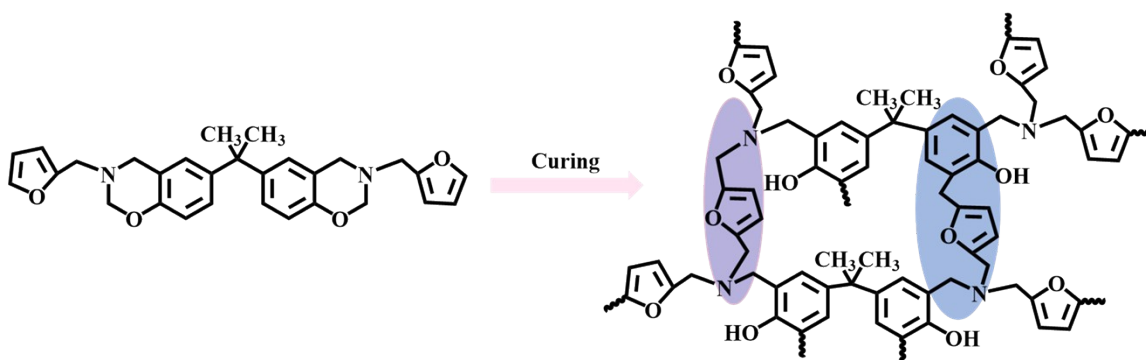

Figure S3. Curing mechanism of BA-F

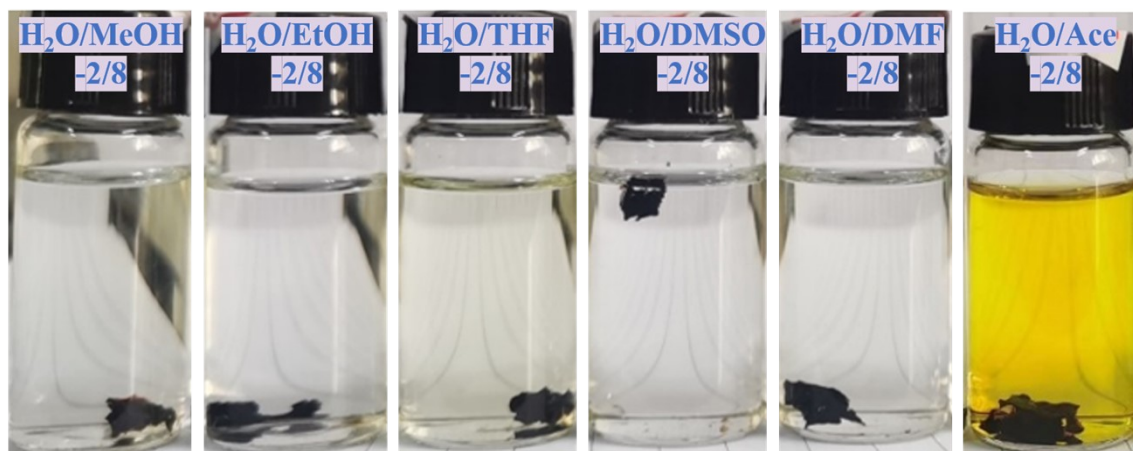

Figure S4 Dissolution experiments of PHDF in different solvents (water/MeOH, EtOH, THF, DMSO, DMF in the ratio of 2/8 at room temperature

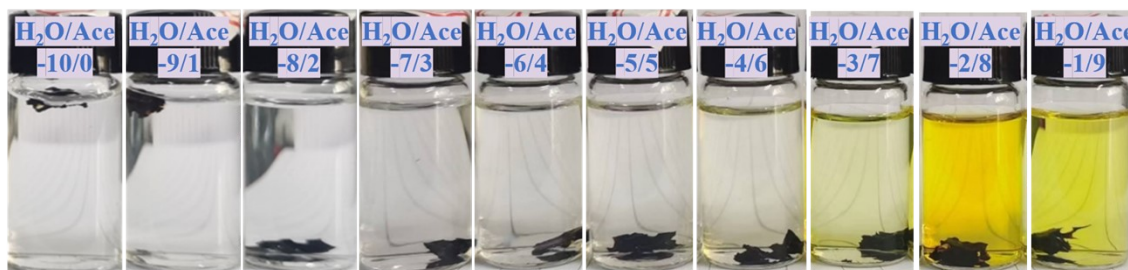

Figure S5 Dissolution experiments of PHDF in the ratio of water/Ace from 10/0 to 1/9) at room temperature at room temperature
